# Supplementary material for: Copper Quantum Dot/Polyacrylamide Composite Nanospheres: Spreading on Quartz Flake Surfaces and Displacing Crude Oil in Microchannel Chips
Source: MDPI journal article supplement (doi:10.3390/polym16081085), 2024-04-12
Supplement: s1 [file s1]

# **Copper quantum dot/polyacrylamide composite nanospheres: spreading on quartz flake surfaces and displacing crude oil in microchannel chips**

Xinru Ma <sup>1,†</sup>, Haien Yang <sup>2,†</sup>, Xiaofei Liu <sup>1,\*</sup>, Lixiang Zeng <sup>2</sup>, Xinzi Li <sup>1</sup>, Lijun Zheng <sup>2</sup>,  
Yu Yang <sup>1</sup>, Lei Cao <sup>1</sup>, Weikai Meng <sup>1</sup> and Junping Zheng <sup>1</sup>

<sup>1</sup> Tianjin Key Laboratory of Composite and Functional Materials, School of Material Science and Engineering, Tianjin University, Tianjin, 300072, China

<sup>2</sup> Xi'an Changqing Chemical Industry Group Co., Ltd, Xi'an, 710021, China

\* Email: liuxf315@aliyun.com

† These authors contributed equally to this work.

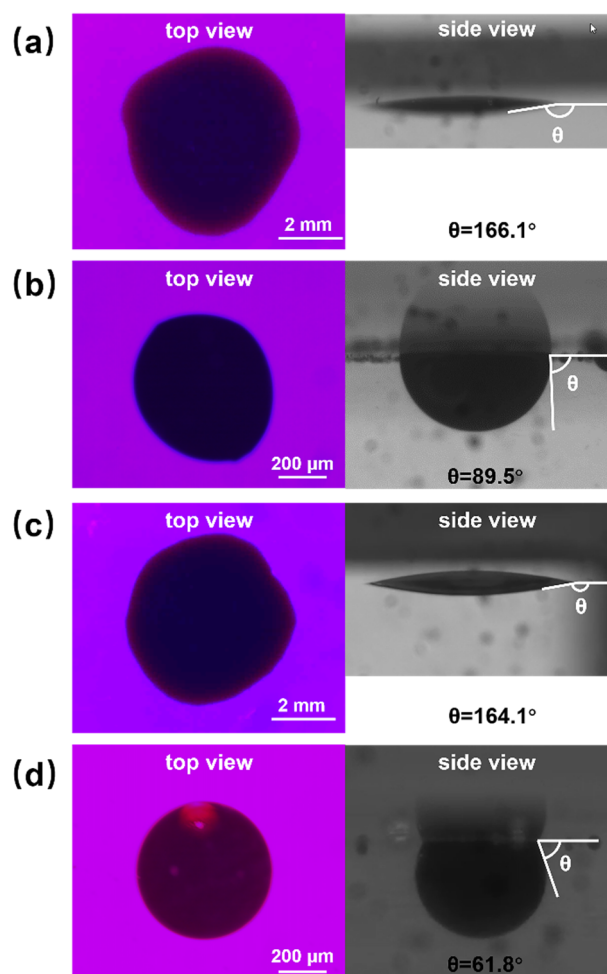

**Figure S1.** Images of 0.1 wt% acrylamide copolymer nanospheres dry powder dispersion at different temperatures for nanofluid spreading experiments: **(a)** 25°C, experimental initial plots; **(b)** 25°C, experimental 60 min effect plots; **(c)** 65°C, experimental initial plots; **(d)** 65°C, experimental 60 min effect plots.

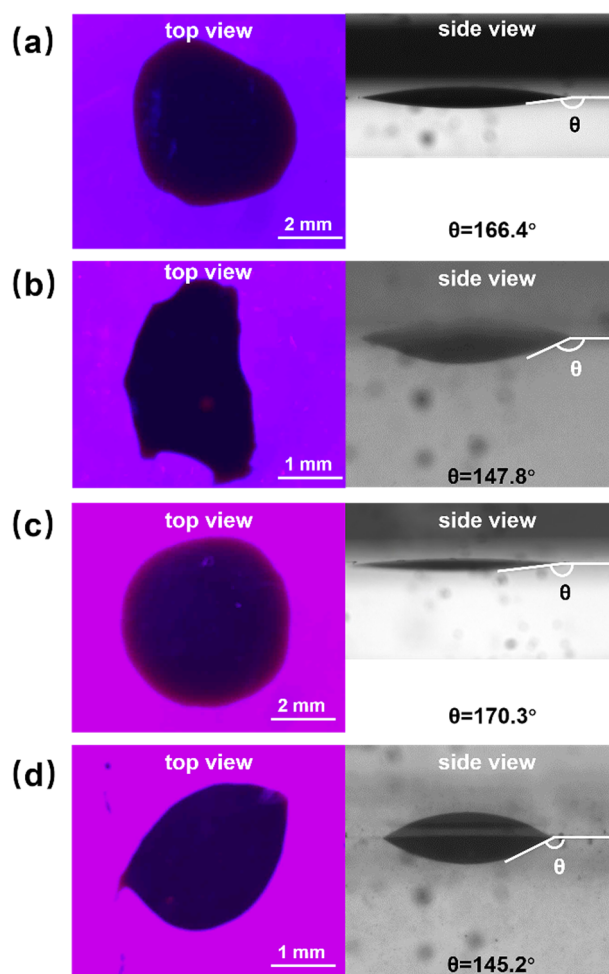

**Figure S2.** Images of 100 ppm copper quantum dot dispersion at different temperatures for nanofluid spreading experiments: **(a)** 25°C, experimental initial plots; **(b)** 25°C, experimental 60 min effect plots; **(c)** 65°C, experimental initial plots; **(d)** 65°C, experimental 60 min effect plots.

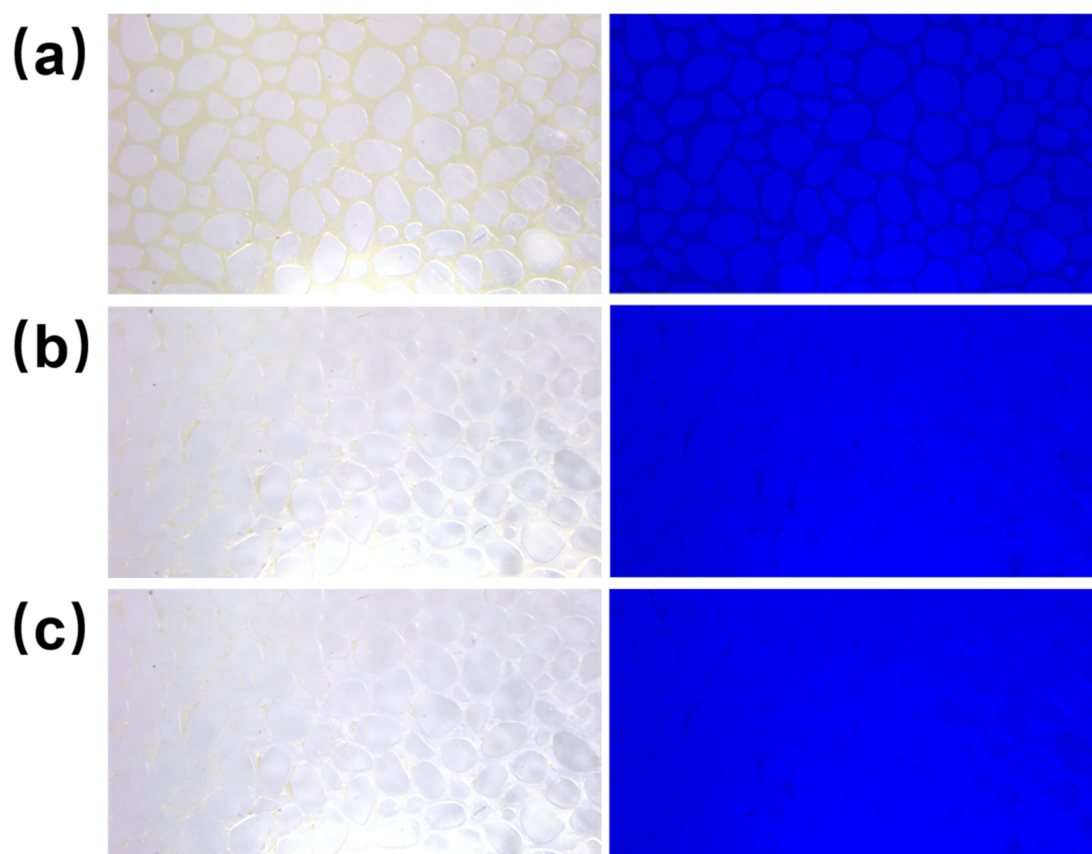

**Figure S3.** Real-time images and blue channel histograms of microchannel chip oil displacement experiments (large channel, 25°C, deionized water):  
(a) Original oil-filled image; (b) After injection of acrylamide copolymer nanosphere emulsion dispersion; (c) After injection of copper quantum dot dispersion.

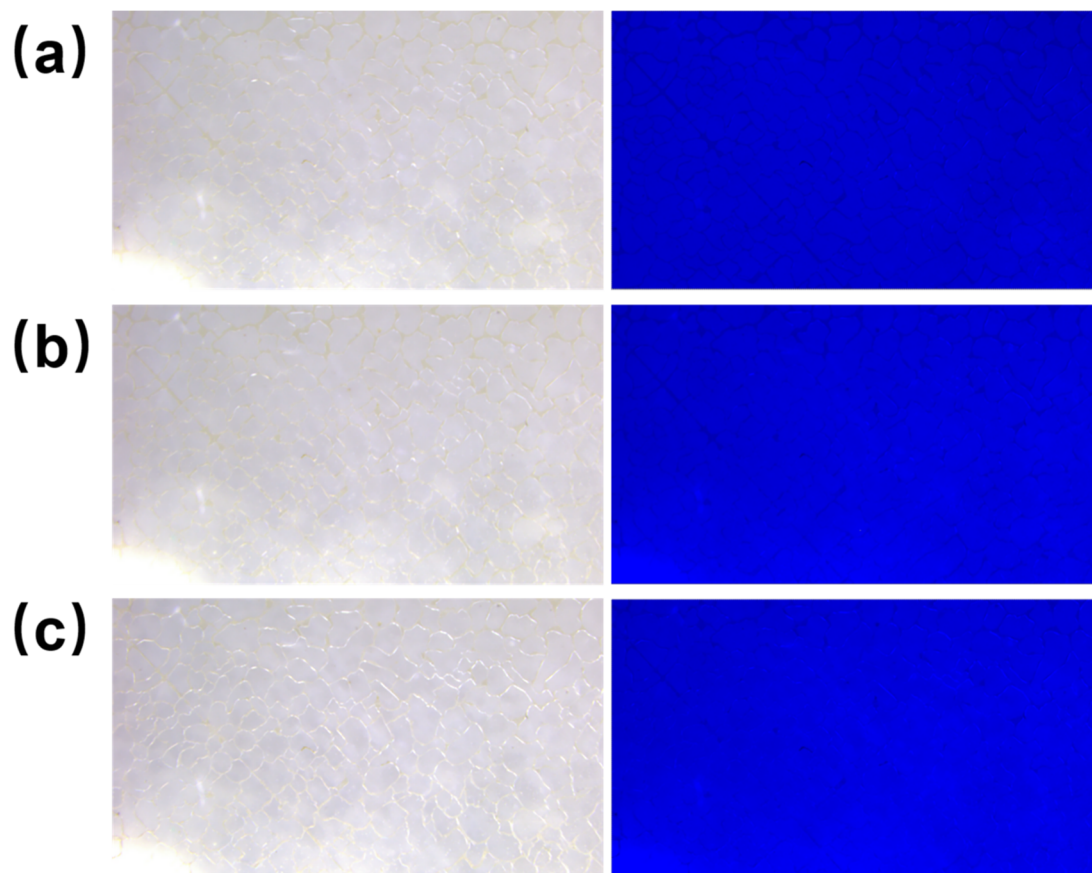

**Figure S4.** Real-time images and blue channel histograms of microchannel chip oil displacement experiments (small channel, 25°C, deionized water):  
(a) Original oil-filled image; (b) After injection of acrylamide copolymer nanosphere emulsion dispersion; (c) After injection of copper quantum dot dispersion.

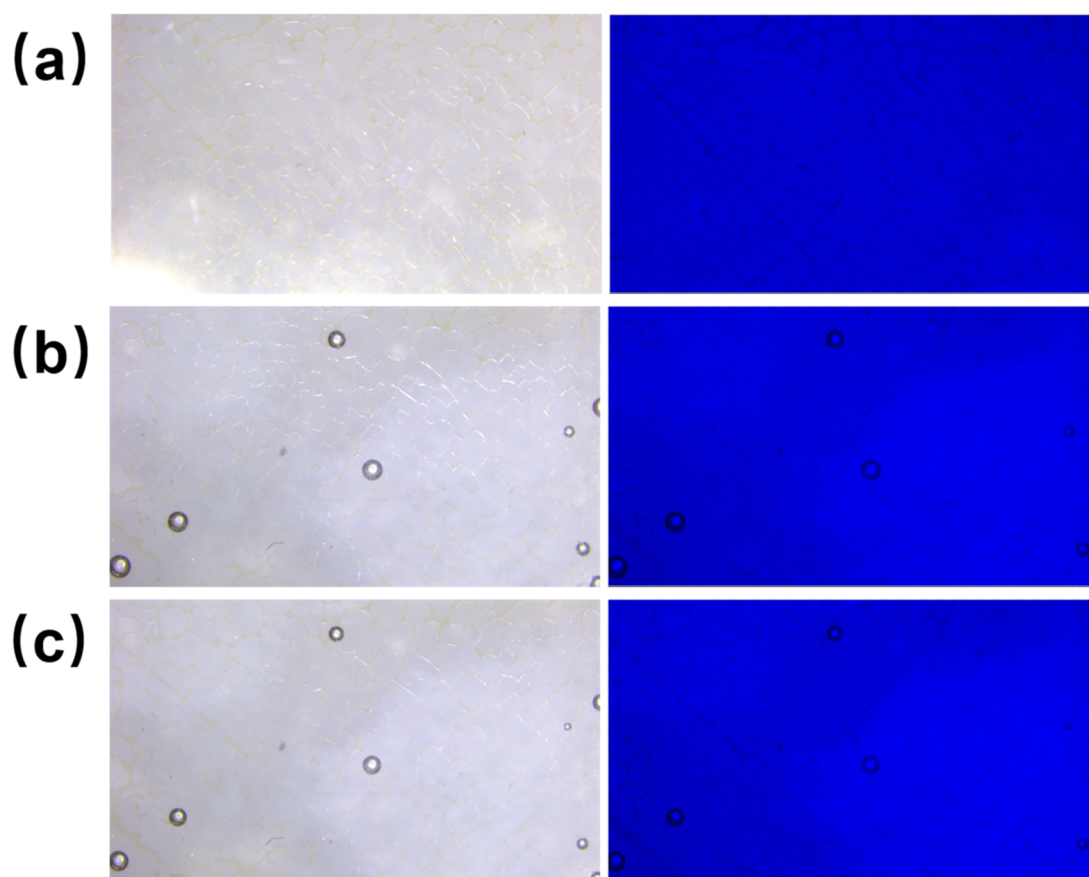

**Figure S5.** Real-time images and blue channel histograms of microchannel chip oil displacement experiments (small channel, 65°C, deionized water):  
**(a)** Original oil-filled image; **(b)** After injection of acrylamide copolymer nanosphere emulsion dispersion; **(c)** After injection of copper quantum dot dispersion.



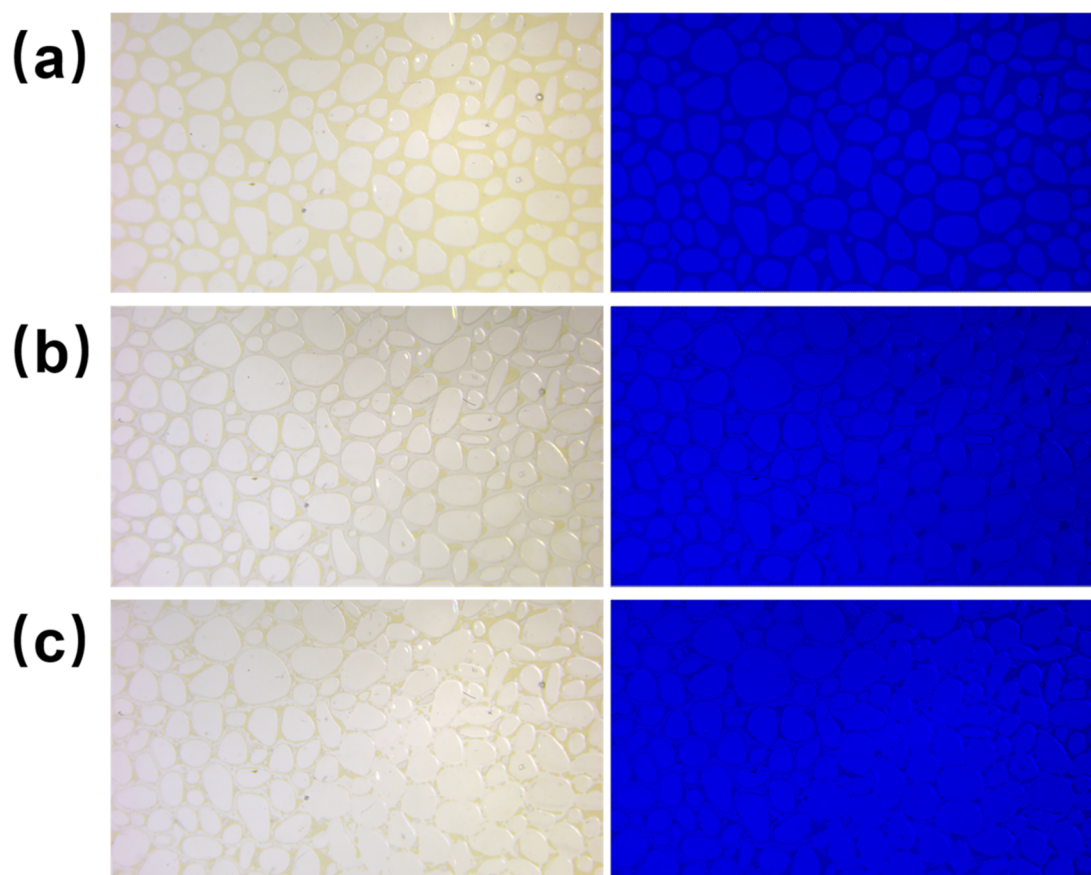

**Figure S6.** Real-time images and blue channel histograms of microchannel chip oil displacement experiments (large channel, 25°C, injected water): **(a)** Original oil-filled image; **(b)** After injection of acrylamide copolymer nanosphere emulsion dispersion; **(c)** After injection of copper quantum dot dispersion.
